# Supplementary material for: Pathologic Response to Neoadjuvant Sequential Chemoradiation Therapy in Locally Advanced Breast Cancer: Preliminary, Translational Results from the French Neo-APBI-01 Trial
Source: MDPI journal article supplement (doi:10.3390/cancers15072030), 2023-03-29
Supplement: s1 [file s1]

**Supplementary Table S1:** Immunohistochemical staining

| Antigen      | Clone | Distributor             | Dilution | Incubation | Detection     | Interpretation                                                                                                                                                                                                                                                                                                     |
|--------------|-------|-------------------------|----------|------------|---------------|--------------------------------------------------------------------------------------------------------------------------------------------------------------------------------------------------------------------------------------------------------------------------------------------------------------------|
| <b>p53</b>   | DO-7  | Agilent                 | 1/200    | 40 min     | ultraView DAB | According to [52].<br><br>Strong diffuse nuclear staining in tumor cells: TP53 missense mutation(s)<br><br>No nuclear staining in tumor cells with heterogeneous moderate/weak staining in benign cells: TP53 ‘null’ mutation<br><br>Heterogeneous moderate/weak nuclear staining in tumor cells: no TP53 mutation |
| <b>pRb</b>   | 358   | Novocastra              | 1/50     | 60 min     | OptiView DAB  | pRb present: tumor cell nuclear staining*                                                                                                                                                                                                                                                                          |
| <b>CD8</b>   | SP16  | ThermoFisher Scientific | 1/200    | 60 min     | OptiView DAB  | CD8+ TILs: with membranous staining*                                                                                                                                                                                                                                                                               |
| <b>CD4</b>   | SP35  | CellMarque              | 1/50     | 60 min     | ultraView DAB | CD4+ TILs: with membranous staining*                                                                                                                                                                                                                                                                               |
| <b>CD20</b>  | SP32  | CellMarque              | 1/200    | 60 min     | ultraView DAB | CD20+ TILs: with membranous staining*                                                                                                                                                                                                                                                                              |
| <b>FoxP3</b> | SP97  | ThermoFisher Scientific | 1/100    | 60 min     | ultraView DAB | FoxP3+ TILs: with nuclear staining*                                                                                                                                                                                                                                                                                |
| <b>PD-L1</b> | 28-8  | Abcam                   | 1/50     | 60 min     | OptiView DAB  | % of tumor cells with membranous staining*<br><br>% of immune cells (TILs and macrophages) with membranous staining*                                                                                                                                                                                               |

*Legend: ultraView DAB, ultraView Universal DAB Detection Kit (Ventana/Roche, Meylan, France); OptiView DAB, OptiView DAB IHC Detection Kit (Ventana/Roche, Meylan, France); \*any intensity; TILs, tumor-infiltrating lymphocytes. All stainings were performed in Benchmark Ultra automates (Ventana/Roche, Meylan, France).*

**Supplementary Table S2:** Immune-related histological markers

| Variable                                       | N  | NACT, N = 21 <sup>1</sup> | NACRT, N = 21 <sup>1</sup> | p-value <sup>2</sup> |
|------------------------------------------------|----|---------------------------|----------------------------|----------------------|
| <b>Immuno-phenotype</b>                        | 39 |                           |                            | 0.8                  |
| Inflamed                                       |    | 5 (26%)                   | 7 (35%)                    |                      |
| Excluded                                       |    | 9 (47%)                   | 9 (45%)                    |                      |
| Deserted                                       |    | 5 (26%)                   | 4 (20%)                    |                      |
| <b>Tumor-infiltrating lymphocytes</b>          | 40 |                           |                            | 0.5                  |
| < 10%                                          |    | 12 (63%)                  | 10 (48%)                   |                      |
| ≥10% - <30%                                    |    | 4 (21%)                   | 7 (33%)                    |                      |
| ≥30% - <50%                                    |    | 0 (0%)                    | 2 (9.5%)                   |                      |
| ≥50%                                           |    | 3 (16%)                   | 2 (9.5%)                   |                      |
| <b>TIL subpopulations (per mm<sup>2</sup>)</b> |    |                           |                            |                      |
| TIL CD8+                                       | 39 | 399 (235, 1,097)          | 583 (269, 1,069)           | 0.6                  |
| TIL CD4+                                       | 38 | 1,227 (595, 1,577)        | 1,255 (855, 2,099)         | 0.4                  |
| TIL FOXP3+                                     | 39 | 234 (95, 445)             | 331 (140, 562)             | 0.5                  |
| TIL CD20+                                      | 39 | 226 (53, 604)             | 446 (216, 1,238)           | 0.2                  |
| TIL T lymphocytes                              | 39 | 1,502 (770, 2,420)        | 2,011 (1,020, 3,365)       | 0.4                  |
| TIL total lymphocytes                          | 39 | 1,902 (1,002, 2,819)      | 2,502 (1,249, 4,603)       | 0.5                  |
| <b>TP53 mutation status</b>                    | 36 |                           |                            | >0.9                 |
| No mutation                                    |    | 4 (21%)                   | 4 (24%)                    |                      |
| Mutated type null                              |    | 8 (42%)                   | 6 (35%)                    |                      |
| Mutated type missense                          |    | 7 (37%)                   | 7 (41%)                    |                      |
| <b>pRb status</b>                              | 36 |                           |                            | >0.9                 |
| Absent                                         |    | 5 (26%)                   | 4 (24%)                    |                      |
| Present                                        |    | 14 (74%)                  | 13 (76%)                   |                      |

<sup>1</sup> n (%); Median (IQR)<sup>2</sup> Fisher's exact test; Wilcoxon rank sum exact test

Legend: NACT: neoadjuvant chemotherapy, NACRT: neoadjuvant chemo-radiotherapy, TIL: tumor-infiltrating lymphocyte.

**Supplementary Table S3:** Immune-related systemic markers

| Variable          | N  | NACT, N = 21 <sup>1</sup> | NACRT, N = 21 <sup>1</sup> | p-value <sup>2</sup> |
|-------------------|----|---------------------------|----------------------------|----------------------|
| Leukocyte (G/L)   | 42 | 5.80 (4.60, 6.70)         | 6.60 (5.70, 7.84)          | 0.2                  |
| Neutrophil (G/L)  | 42 | 3.06 (2.10, 4.22)         | 3.94 (2.92, 5.24)          | 0.11                 |
| lymphocyte (G/L)  | 42 | 1.70 (1.57, 2.48)         | 1.83 (1.41, 2.35)          | >0.9                 |
| Monocyte (G/L)    | 42 | 0.48 (0.34, 0.50)         | 0.50 (0.40, 0.62)          | 0.2                  |
| Platelet (G/L)    | 42 | 271 (222, 301)            | 309 (265, 361)             | <b>0.05</b>          |
| Hemoglobin (g/dL) | 42 | 12.90 (12.70, 13.60)      | 13.40 (12.50, 13.90)       | 0.5                  |
| NLR               | 42 | 1.77 (1.02, 2.24)         | 1.77 (1.22, 3.29)          | 0.3                  |
| PLR               | 42 | 149 (109, 186)            | 201 (125, 211)             | <b>0.10</b>          |
| LMR               | 42 | 4.00 (3.31, 4.71)         | 3.55 (3.13, 4.61)          | 0.4                  |
| SII               | 42 | 513 (253, 825)            | 650 (378, 1,018)           | <b>0.087</b>         |

<sup>1</sup> Median (IQR)

<sup>2</sup> Wilcoxon rank sum test; Wilcoxon rank sum exact test

*Legend: LMR: lymphocyte-monocyte, NACT: neoadjuvant chemotherapy, NACRT: neoadjuvant chemo-radiotherapy, NLR: neutrophil-lymphocyte ratio, PLR: platelet-lymphocyte ratio, SII: systemic immune-inflammation index.*
